# Supplementary material
Source: Springer Nature journal article supplement (https://www.springermedizin.de/resource/supplementary/12936_2008_668_MOESM1_ESM.pdf/9547960)

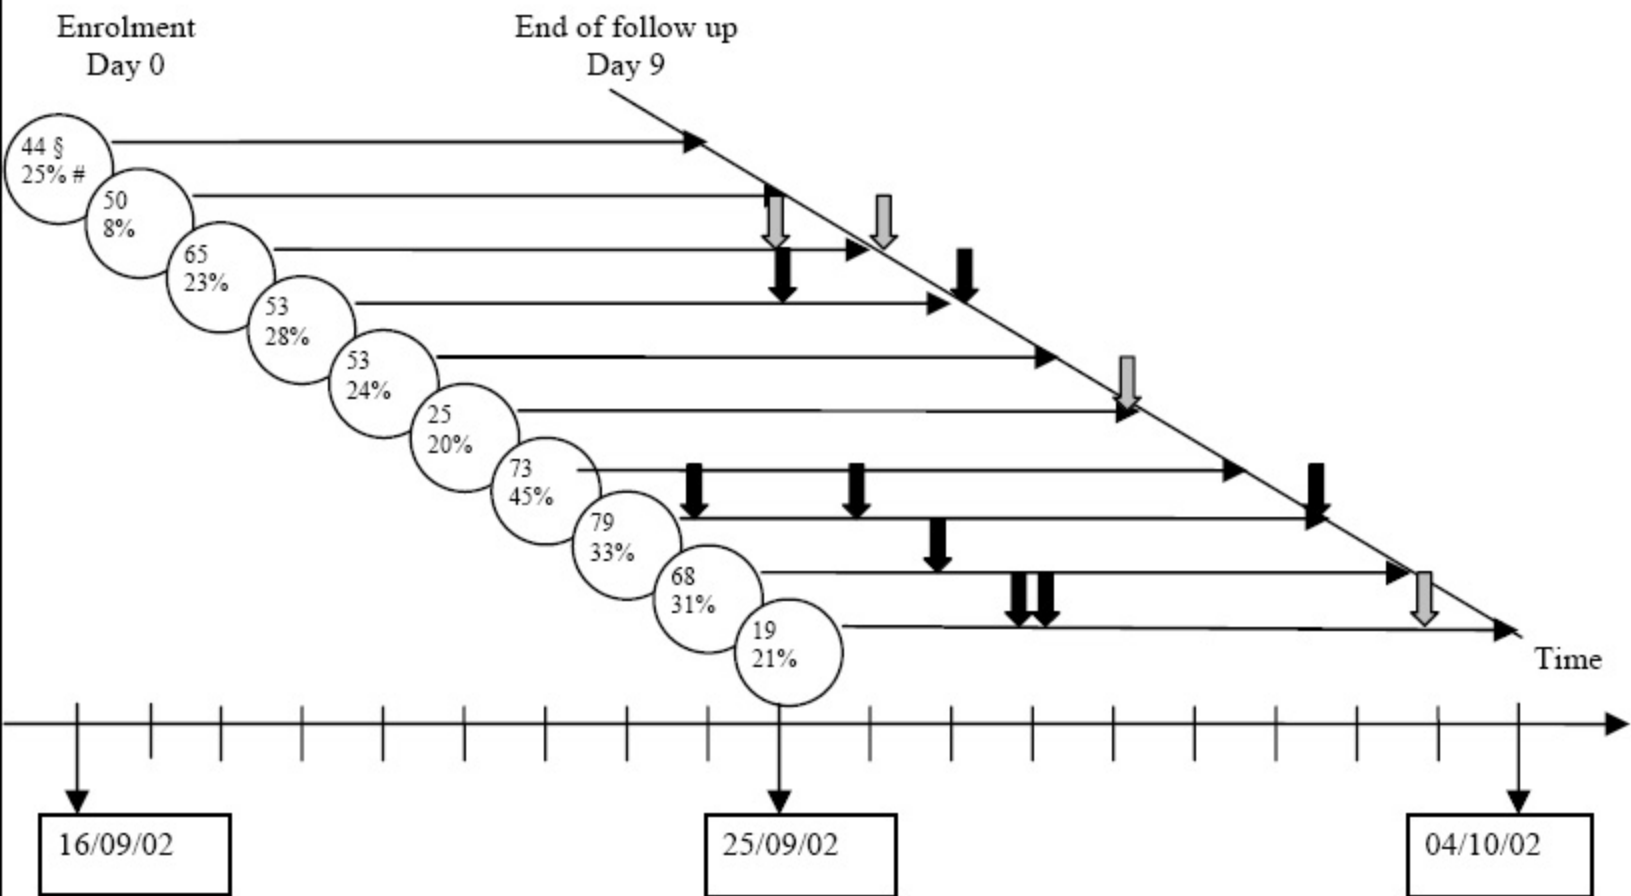

-  Clinical malaria in asymptomatic carriers
-  Clinical malaria in non carriers

Supplement: MOESM1 [file 9547960]
